# Supplementary material for: DOPS Adjuvant Confers Enhanced Protection against Malaria for VLP-TRAP Based Vaccines
Source: Diseases. 2018 Nov 21;6(4):107. doi: 10.3390/diseases6040107 (PMC6313579; doi:10.3390/diseases6040107)
Supplement: Supplementary file 1 [file diseases-06-00107-s001.pdf]

# Supplementary

## DOPS adjuvant confers enhanced protection against malaria for VLP-TRAP based vaccines

Gustavo Cabral-Miranda<sup>1,2\*,a</sup>, Ahmed M. Salman<sup>1,a</sup>, Mona O. Mohsen<sup>1</sup>, Federico L. Storni<sup>2</sup>, Elisa S. Roesti<sup>2</sup>, Murray A. Skinner<sup>3</sup>, Matthew D. Heath<sup>3</sup>, Matthias F. Kramer<sup>3</sup>, Shahid M. Khan<sup>4</sup>, Chris J. Janse<sup>4</sup>, Adrian V.S. Hill<sup>1</sup>, Martin F Bachmann<sup>1,2\*</sup>

<sup>1</sup> The Jenner Institute, Nuffield Department of Medicine, Centre for Cellular and Molecular Physiology (CCMP); University of Oxford; UK

<sup>2</sup> Immunology, RIA, Inselspital, University of Bern, Switzerland

<sup>3</sup> Allergy Therapeutics (UK) Ltd. Dominion Way, Worthing BN14 8SA, United Kingdom

<sup>4</sup> Department of Parasitology, Leiden University Medical Center, Albinusdreef 2, 2333 ZA Leiden, The Netherlands.

a Equal contribution as first author.

Correspondence may be addressed:

\* Martin Bachmann - [martin.bachmann@me.com](mailto:martin.bachmann@me.com)

\* Gustavo Cabral de Miranda - [gcabral.miranda@gmail.com](mailto:gcabral.miranda@gmail.com)

Immunology, RIA, Inselspital, University of Bern, 3010; Switzerland; Phone +41 (0) 31 632 60 45 ; Fax: +41 (0)31 381 57 35

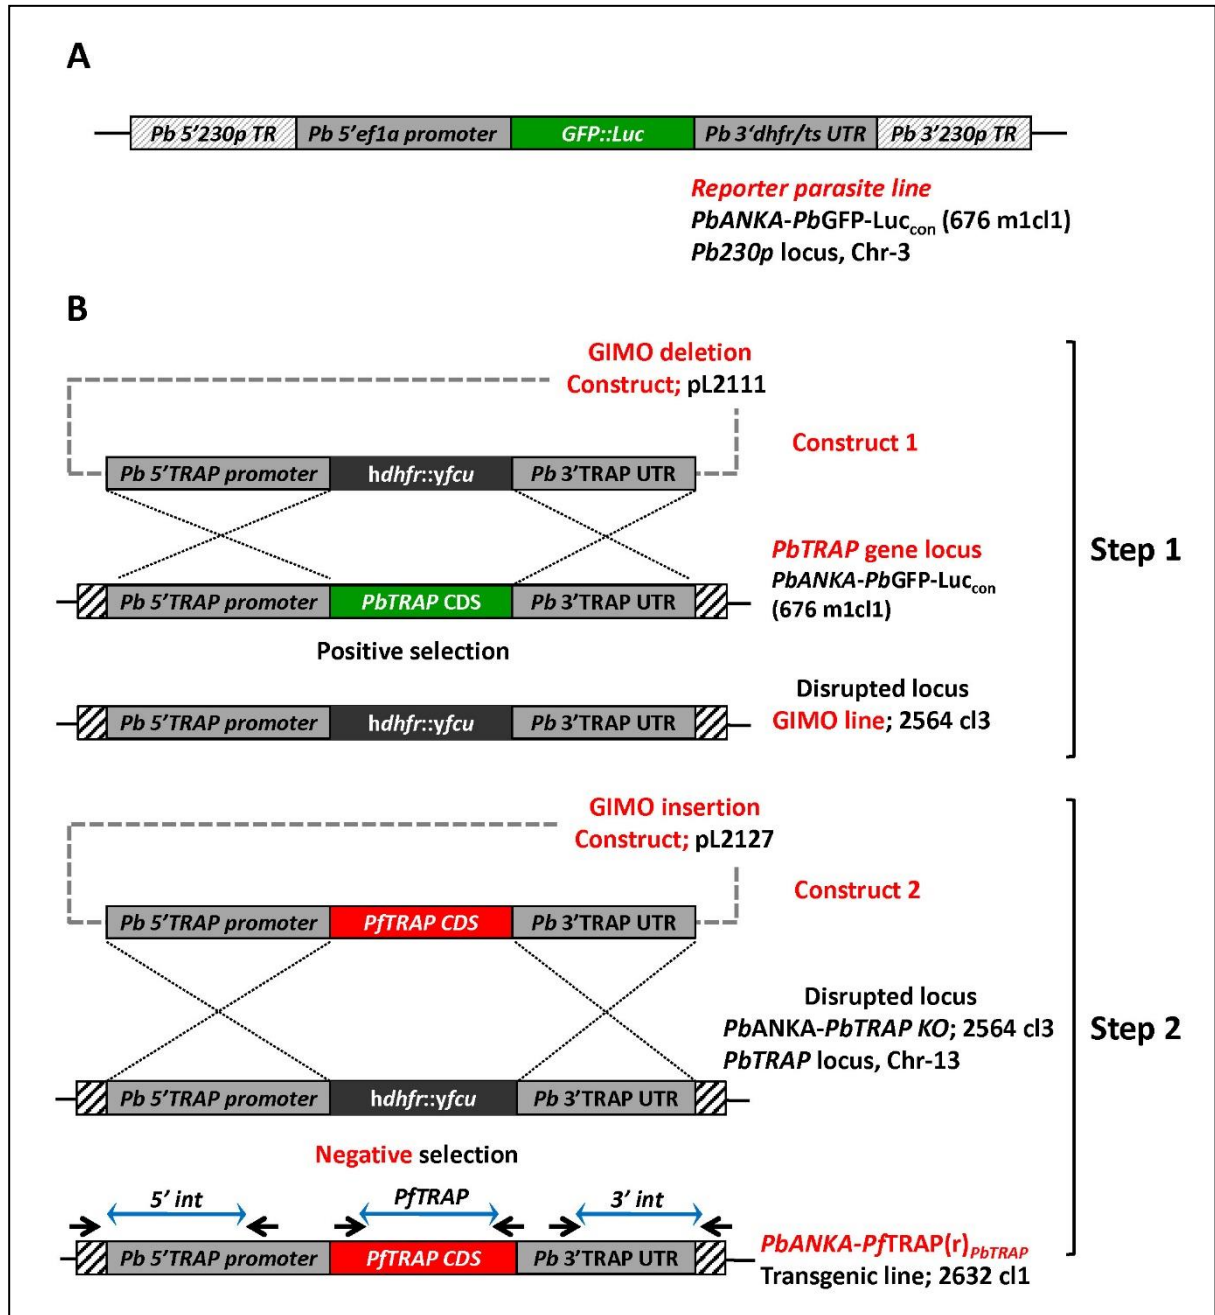

**Figure S1.** Strategy to generate a chimeric *P. berghei* parasite line expressing *P. falciparum* TRAP. **A.** Schematic representation of the transgenic *p230p* locus of the reporter *PbANKA* parasite line *PbGFP-Luc<sub>Cef1a</sub>* (676m1cl1) which used to generate the single replacement gene [SRG] chimeric parasite line (see **B**). This reporter line expresses a fusion protein of GFP and firefly luciferase (LUC-IAV) under the constitutive *Pbeef1a* promoter and is selectable marker (SM) free. The reporter-cassette is integrated into the neutral *p230p* locus in chromosome 3. **B.** Schematic representation of the generation of the chimeric line *PbANKA-PfTRAP(r)<sub>PbTRAP</sub>* (line 2632 cl1) where the GIMO deletion-construct (construct 1; pL2111) is used to replace the *Pbtrap* coding sequence (CDS) with the positive/negative selectable marker (SM; *hdhfr::yfcu*) cassette, resulting in the generation of the *Pbtrap* GIMO line (*PbANKA-PbTRAP* GIMO; line 2564 cl3) after positive selection with pyrimethamine. Construct 1 targets the *Pbtrap* gene by double cross-over homologous recombination. **Step 2:** The GIMO insertion-construct (construct 2; pL2127) is used to replace the SM in the *Pbtrap* GIMO line with the *Pftrap* CDS after negative selection using 5-fluorocytosine (5-FC), resulting in the transgenic line *PbANKA-PfTRAP(r)<sub>PbTRAP</sub>* (line 2632 cl1). Construct 2 integrates by double cross-over homologous recombination using the same targeting regions (TRs) employed in construct 1, resulting in the introduction of the *Pftrap* CDS under the control of the *Pbtrap* gene

promoter and transcriptional terminator sequences and removal of the SM. Black arrows: location of primers used for diagnostic PCR (see Fig. S1-B).

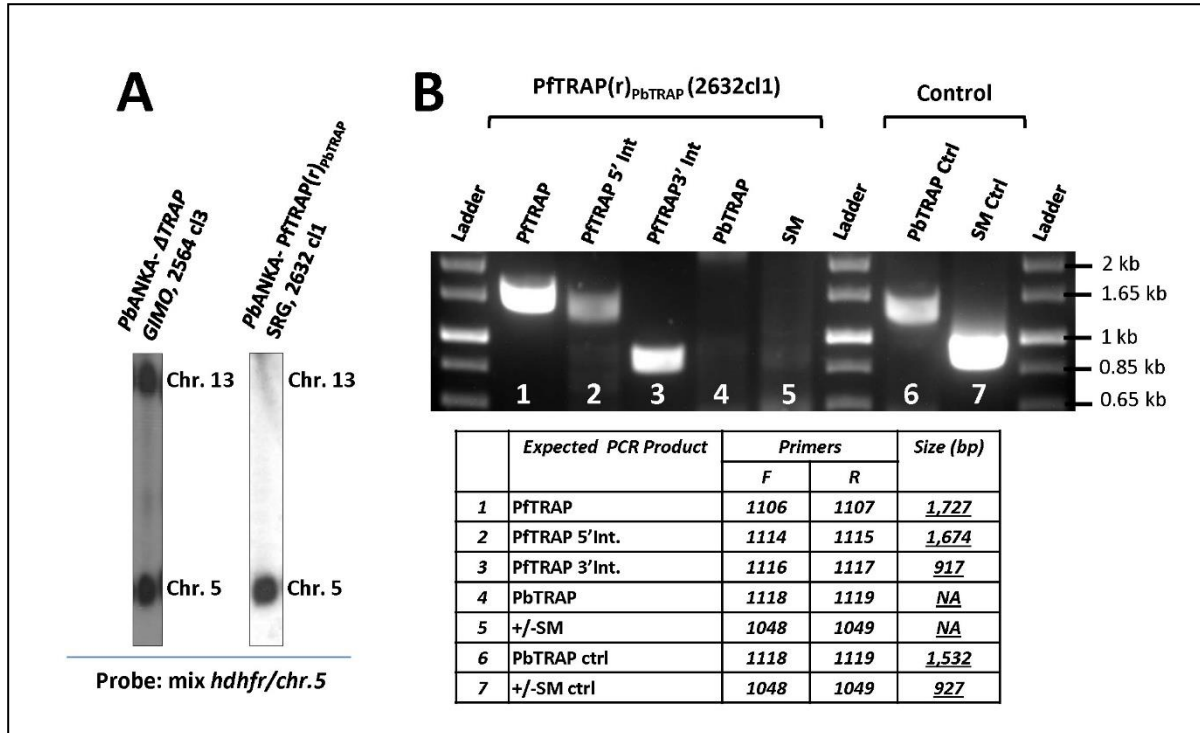

**Figure S2.** Genotype analyses of the chimeric *P. berghei* parasite line expressing *P. falciparum* TRAP. **A.** Genotype analysis of Single Replacement Gene [SRG] chimeric parasites (PbANKA-PfTRAP(r)<sub>PbTRAP</sub>; line 2632 cl1) and their intermediate GIMO mother-line (2564 cl3) by Southern analysis of chromosomes (chr.) separated by pulsed-field gel electrophoresis (PFGE) and by diagnostic PCR analysis. **Left panel:** Hybridisation of chr. of line 2564 cl3 with a mixture of two probes: one recognizing *hdhfr* and a control probe recognizing chr-5 confirms integration of construct pL2111 (Fig. S2-A) into the *Pbtrap* gene on chr. 13. In addition, this probe hybridizes to chr. 5 (Fig. S2-A). **Right panel:** The correct integration of the *PfTRAP* expression construct (pL2127; Fig. S1) into the GIMO locus was confirmed by showing the removal of the *hdhfr::yfcu* selectable marker (SM) cassette in the cloned chimeric parasite line 2632 cl1. The southern blot is hybridized with a mixture of two probes: one recognizing *hdhfr* and a control probe recognizing chr-5. **B.** Genotype analysis by diagnostic PCR analysis of the chimeric parasite line 2632 cl1 (left panel) confirms correct integration of the *PfTRAP* expression cassette. Correct integration is shown by the absence of the *hdhfr::yfcu* SM and the *Pbtrap* CDS, the presence of the *PfTRAP* CDS, and the correct integration of the construct into the genome both at the 5' and 3' regions (5'int and 3'int; see Figure S1 for primers locations). Primers sequences used are shown in Table S2, while the expected PCR product sizes and the primer numbers are listed in the table below the PCR analysis.

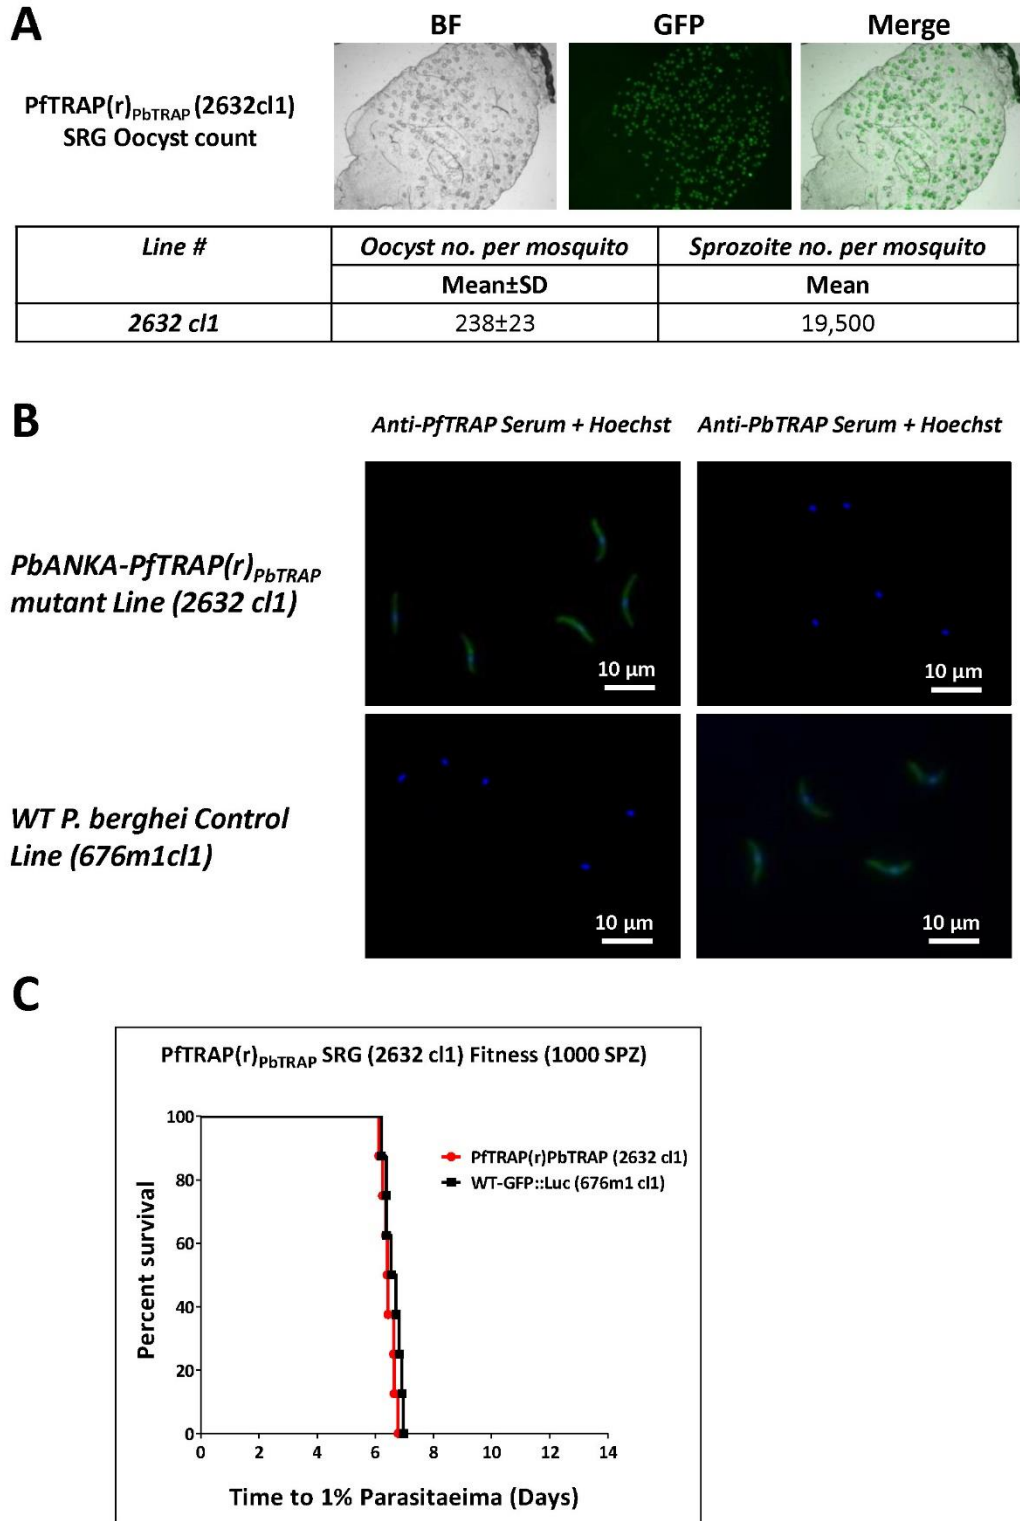

**Figure S3.** Phenotype analyses and fitness of the chimeric *P. berghei* parasite line expressing *P. falciparum* TRAP. A. Mosquito stage (midgut oocysts) expressing of GFP under the constitutively active *Pbeef1a* promoter. B. Immunofluorescence analysis demonstrating *PfTRAP* antigen expression in sporozoites of the chimeric line 2632 cl1. Salivary-gland sporozoites were stained with anti-*PfTRAP* and anti-*PbTRAP* antibodies containing sera from mice vaccinated against *PfTRAP* or *PbTRAP* (Alexa Fluor 488, green; nuclear staining with Hoechst-33342). As a control, wild-type (WT; line 676m1 cl1) *P. berghei* sporozoites were stained with the same antibodies containing sera. Merged images of the different channels are shown for both chimeric and WT *P. berghei* sporozoites. C.

Fitness assessment of sporozoites the chimeric line 2632cl1. Prepatent period in mice after injection of  $10^3$  sporozoites of line 2632 cl1 and of wild-type *P. berghei* parasites. The prepatent (i.e. the time to reach 1% parasitaemia) was similar in mice infected with 2632 cl1 and WT sporozoites (Log-rank (Mantel-Cox) Test; P-value 0.1254).

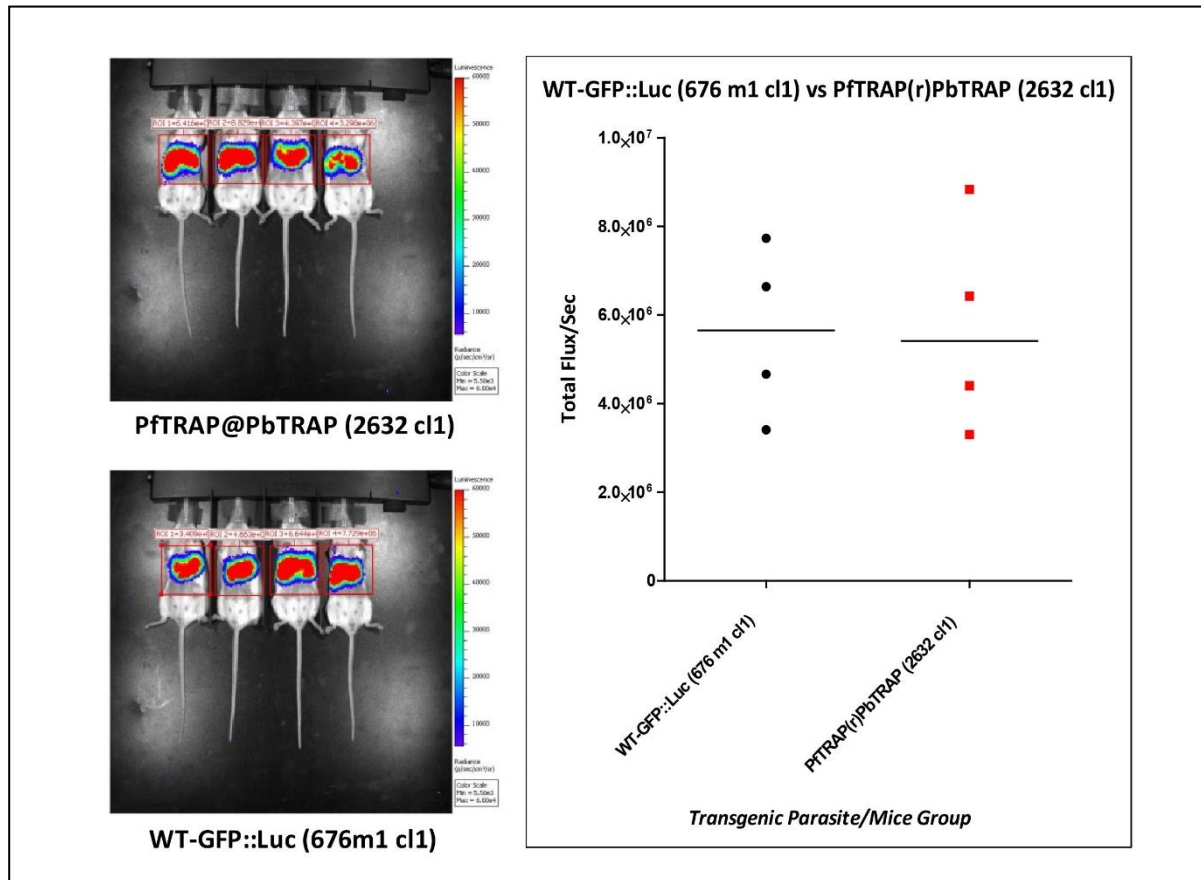

**Figure S4.** *In vivo* imaging. Liver loads in naïve mice that were challenged with transgenic sporozoites were quantified by measuring luminescence levels at 44 hours after infection using the IVIS 200 system. Results are presented as the total flux measured per second. Left panel: [A] WT-GFP::Luc (676ma cl1) control and [B] PfTRAP(r)<sub>PbTRAP</sub>, (2632 cl1). Right panel: Quantification of the bioluminescence signal emitted from infected mice in each group measured as total flux/sec (no significant difference between the two groups, P-value 0.9374).

**Table S1.** Primers for genotyping the transgenic parasite line.

| Primer No. | Description            | Primer sequences                     |
|------------|------------------------|--------------------------------------|
| 1048       | hDHFR-yFCU (+/-SM) F   | ATCATGCAAGACTTTGAAAGTGAC             |
| 1049       | hDHFR-yFCU (+/-SM) R   | CATCGATTACCAGCTCTGAC                 |
| 1106       | PfTRAP Int. F          | ATGAATCATCTTGGGAATGTAAATAT<br>TTAGTC |
| 1107       | PfTRAP Int. R          | ATTTAATTCCACTCGTTTTCTTCAGG           |
| 1114       | PfTRAP@PbTRAP 5'Int.   | AAATTGCCCCCTTTTTGTGTTC               |
| 1115       | PfTRAP@PbTRAP 5'Int.   | TTGCACATCTCTACCATTAAGTAG             |
| 1116       | PfTRAP@PbTRAP 3'Int. F | AACACCCTATGCCGGAGAAC                 |
| 1117       | PfTRAP@PbTRAP 3'Int. R | AATGACTCCAGACATAATAACACAGA<br>TATG   |
| 1118       | PbTRAP F               | ATGGCTCAGGAAGTATTGGTC                |
| 1119       | PbTRAP R               | ACCTATGCATCCAATTATAGCTAATC           |

**Table S2.** Primers for generation of DNA construct.

| DNA Construct | Primer No. | Primer sequences *                                        | Restriction sites | Fragment size (bp) | Description                           |
|---------------|------------|-----------------------------------------------------------|-------------------|--------------------|---------------------------------------|
| pL2111        | 1145       | catgggcccGGAAATTGTCTTACC<br>CATATTATTCCTAC                | Apal              | 1494               | PbTRAP 5'-UTR<br>promoter sequence, F |
|               | 1146       | atctgcaggttaacGAAAGGGAAAA<br>TGGGCAAATTATGTGTC            | PstI + HpaI       |                    | PbTRAP 5'-UTR<br>promoter sequence, R |
|               | 1147       | ccgggggtaccggatccCATATATATC<br>TAGATGATTATTCTTATGTTA<br>C | KpnI +<br>BamHI   | 637                | PbTRAP 3'-UTR<br>sequence, F          |
|               | 1148       | ataagaatgcgcccgcaACTTAAGAG<br>TATTATTTTTGTTTCG            | NotI              |                    | PbTRAP 3'-UTR<br>sequence, R          |
| pL2127        | 1156       | tatcctgcaggATGAATCATCTTGG<br>GAATGTTAAATATTTAGTC          | SbfI + PstI       | 1747               | PfTRAP, F                             |
|               | 1157       | gtaggatccATTTAATTCCACTCG<br>TTTCTTCAGG                    | BamHI             |                    | PfTRAP, R                             |

\* Red color: Restriction site sequence.

**Table S3.** Oocyst and sporozoites production for PfTRAP(r)<sub>PbTRAP</sub> transgenic parasite (line 2632 cl1) in comparison to the WT-GFP::Luc *P. berghei* (line 676m1 cl1).

| Parasite description            | Line number | Oocyst no. (Mean ± SD) | Sporozoites no. (Mean ± SD) |
|---------------------------------|-------------|------------------------|-----------------------------|
| WT <i>P. berghei</i>            | 676m1 cl1   | 116±22                 | 22,800                      |
| <i>PfCSP(r)<sub>Pbcsp</sub></i> | 2632 cl1    | 238±23                 | 19,500                      |
